# Supplementary material for: Cardioprotective Effects of Sodium Glucose Cotransporter 2 Inhibition in Angiotensin II-Dependent Hypertension Are Mediated by the Local Reduction of Sympathetic Activity and Inflammation
Source: Int J Mol Sci. 2023 Jun 27;24(13):10710. doi: 10.3390/ijms241310710 (PMC10341774; doi:10.3390/ijms241310710)
Supplement: Supplementary file 1 [file ijms-24-10710-s001.zip › ijms-2443065-supplementary.pdf]

## Supplementary Materials

Systolic Blood Pressure and Body Weight at the beginning of the experimental protocol.

Before starting the experimental protocol, rats were divided in four groups (Control, Control+Empa, Ang II, Ang II+Empa). Body weight (g) and Systolic Blood Pressure (mmHg) were measured as described in the Methods. No differences were present among the different groups.

| Parameters | Control      | Control + Empa | Ang II      | Ang II + Empa |
|------------|--------------|----------------|-------------|---------------|
| SBP (mmHg) | 143.7 ± 4.0  | 149.1 ± 1.0    | 141.5 ± 4.3 | 140.2 ± 2.7   |
| BW (g)     | 253.6 ± 14.0 | 270.7 ± 5.0    | 261.2 ± 6.3 | 253.1 ± 5.8   |
